# Supplementary material
Source: publisher figshare collection journal article supplement (https://acs.figshare.com/ndownloader/files/16452632)
Supplement: Supplementary file 1 [file 16452632]

# Supporting Information

## Oxide Neuromorphic Transistors Gated by Polyvinyl Alcohol Solid Electrolyte with Ultralow Power Consumption

Li Qiang Guo<sup>1</sup>, Hui Han<sup>1, 2, 3</sup>, Li Qiang Zhu<sup>2, 3, \*</sup>, Yan Bo Guo<sup>2, 3</sup>, Fei Yu<sup>2, 3</sup>, Zheng Yu Ren<sup>2, 3</sup>, Hui Xiao<sup>2, 3</sup>, Zi Yi Ge<sup>2, 3</sup>, Jian Ning Ding<sup>1</sup>

<sup>1</sup> Micro/Nano Science & Technology Center, Jiangsu University, Zhenjiang, 212013, Peoples Republic of China

<sup>2</sup> Key Laboratory of Graphene Technologies and Applications of Zhejiang Province, Ningbo Institute of Materials Technology and Engineering, Chinese Academy of Sciences, Ningbo 315201, Zhejiang, People's Republic of China

<sup>3</sup> Center of Materials Science and Optoelectronics Engineering, University of Chinese Academy of Sciences, Beijing 100049, People's Republic of China

\* Corresponding Author: [lqzhu@nimte.ac.cn](mailto:lqzhu@nimte.ac.cn)

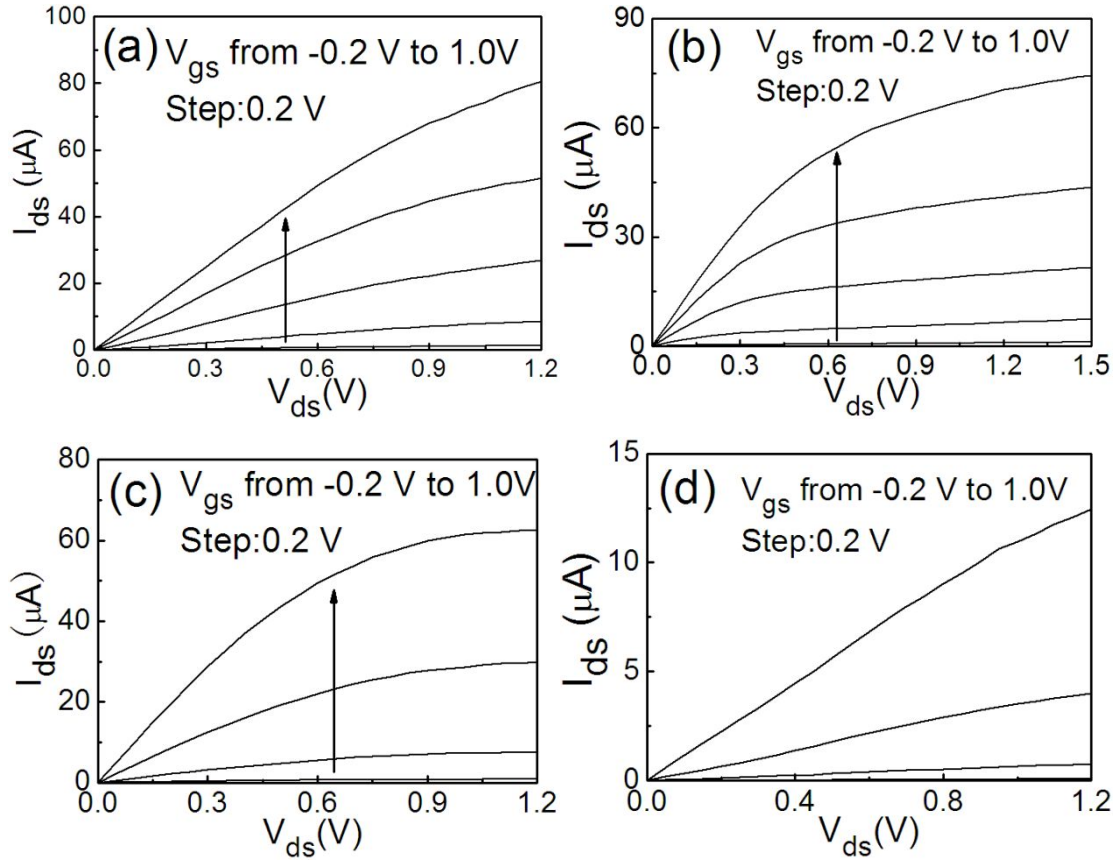

Figure S1 Output curves with different channel thickness ranged between  $\sim 30$  nm and  $\sim 7$  nm. (a) Channel thickness of  $\sim 30$  nm. (b) Channel thickness of  $\sim 23$  nm. (c) Channel thickness of  $\sim 16$  nm. (d) Channel thickness of  $\sim 7$  nm.

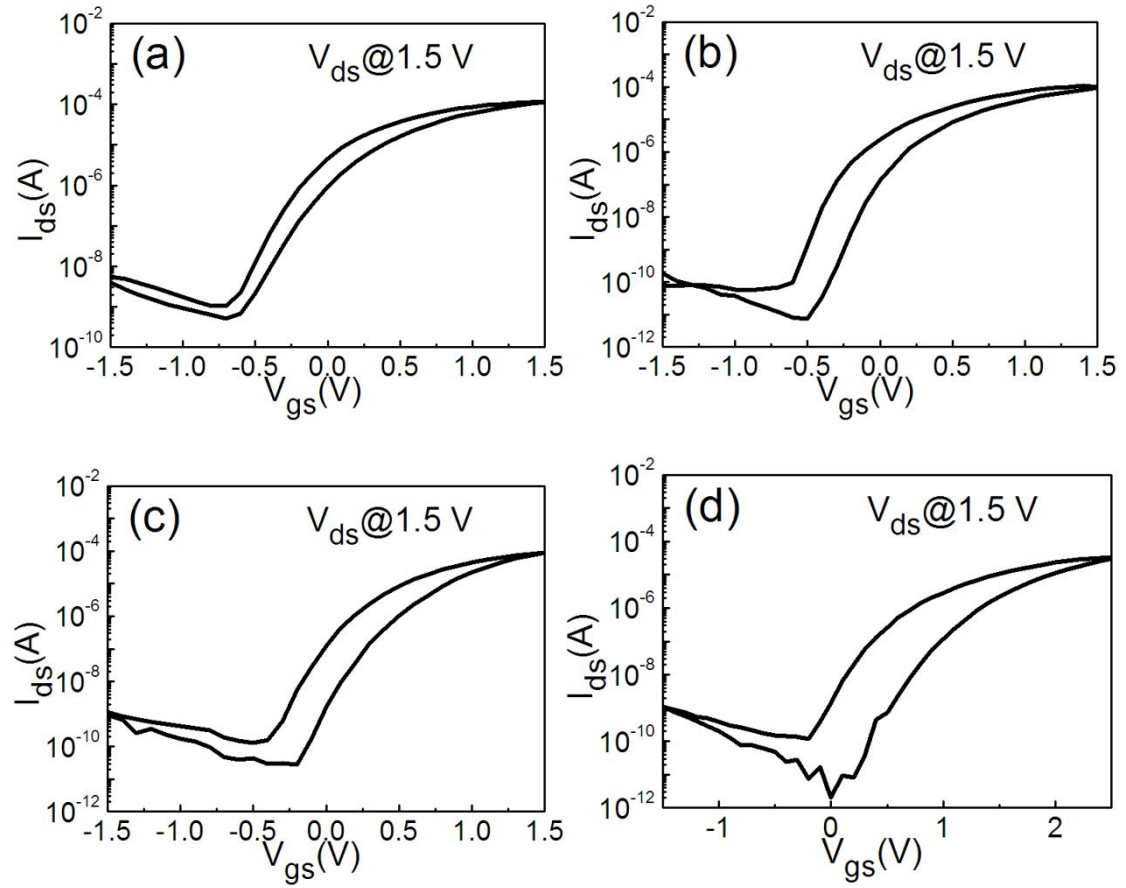

Figure S2 Transfer curves with different channel thickness ranged between  $\sim 30$  nm and  $\sim 7$  nm. (a) Channel thickness of  $\sim 30$  nm. (b) Channel thickness of  $\sim 23$  nm. (c) Channel thickness of  $\sim 16$  nm. (d) Channel thickness of  $\sim 7$  nm.
